# Supplementary material
Source: MDPI journal article supplement (https://www.mdpi.com/2071-1050/10/10/3683)
Supplement: s1 [file s1]

Archive with 2 entries (2 files):
- HM_Results_Sustainability.pdf
- SI_HM_2018_02_10.pdf
