# Supplementary material
Source: MDPI journal article supplement (https://www.mdpi.com/2071-1050/10/10/3683)
Supplement: s1 [file s1]

### Average Values for Adult Population

| Year | Food Energy<br>Demand<br>[kcal/cap/day] | Weight [kg] | Height [cm] | Age [years] | Population<br>[cap] |
|------|-----------------------------------------|-------------|-------------|-------------|---------------------|
| 1975 | 2465.1                                  | 56.7        | 161.0       | 39.7        | 2310073615          |
| 1976 | 2470.0                                  | 57.0        | 161.1       | 39.7        | 2361032131          |
| 1977 | 2475.0                                  | 57.2        | 161.2       | 39.7        | 2413811721          |
| 1978 | 2480.1                                  | 57.4        | 161.3       | 39.7        | 2468512186          |
| 1979 | 2485.0                                  | 57.7        | 161.3       | 39.7        | 2525116004          |
| 1980 | 2489.9                                  | 57.9        | 161.4       | 39.7        | 2583564899          |
| 1981 | 2494.6                                  | 58.1        | 161.5       | 39.6        | 2643215985          |
| 1982 | 2499.2                                  | 58.3        | 161.6       | 39.6        | 2703472182          |
| 1983 | 2503.7                                  | 58.6        | 161.7       | 39.6        | 2765077068          |
| 1984 | 2508.2                                  | 58.8        | 161.8       | 39.6        | 2828993855          |
| 1985 | 2512.5                                  | 59.0        | 161.8       | 39.6        | 2895452568          |
| 1986 | 2516.7                                  | 59.2        | 161.9       | 39.6        | 2959241993          |
| 1987 | 2520.7                                  | 59.4        | 162.0       | 39.6        | 3025936297          |
| 1988 | 2524.6                                  | 59.6        | 162.0       | 39.6        | 3094474840          |
| 1989 | 2528.4                                  | 59.8        | 162.1       | 39.7        | 3163836782          |
| 1990 | 2532.1                                  | 60.0        | 162.2       | 39.7        | 3233611782          |
| 1991 | 2535.4                                  | 60.2        | 162.2       | 39.7        | 3298514865          |
| 1992 | 2538.7                                  | 60.4        | 162.3       | 39.8        | 3366476093          |
| 1993 | 2542.0                                  | 60.6        | 162.3       | 39.9        | 3435873369          |
| 1994 | 2545.3                                  | 60.7        | 162.4       | 40.0        | 3504771252          |
| 1995 | 2548.5                                  | 60.9        | 162.4       | 40.0        | 3572463443          |
| 1996 | 2551.9                                  | 61.1        | 162.5       | 40.1        | 3642506923          |
| 1997 | 2555.2                                  | 61.3        | 162.5       | 40.2        | 3709574960          |
| 1998 | 2558.6                                  | 61.5        | 162.6       | 40.3        | 3775821781          |
| 1999 | 2562.2                                  | 61.7        | 162.6       | 40.4        | 3844200589          |
| 2000 | 2565.9                                  | 61.9        | 162.6       | 40.5        | 3915965390          |
| 2001 | 2569.7                                  | 62.1        | 162.7       | 40.6        | 3986852931          |
| 2002 | 2573.7                                  | 62.3        | 162.7       | 40.7        | 4060187071          |
| 2003 | 2577.7                                  | 62.5        | 162.8       | 40.8        | 4135911621          |
| 2004 | 2581.9                                  | 62.7        | 162.8       | 40.9        | 4213451869          |
| 2005 | 2586.2                                  | 62.9        | 162.8       | 41.0        | 4292426217          |
| 2006 | 2590.3                                  | 63.2        | 162.9       | 41.1        | 4369889045          |
| 2007 | 2594.5                                  | 63.4        | 162.9       | 41.2        | 4449881082          |
| 2008 | 2598.5                                  | 63.6        | 162.9       | 41.3        | 4530741314          |
| 2009 | 2602.1                                  | 63.8        | 163.0       | 41.4        | 4610574708          |
| 2010 | 2605.5                                  | 64.0        | 163.0       | 41.6        | 4688351245          |
| 2011 | 2608.4                                  | 64.2        | 163.0       | 41.7        | 4763419327          |
| 2012 | 2610.9                                  | 64.4        | 163.0       | 41.9        | 4836823686          |
| 2013 | 2613.2                                  | 64.6        | 163.0       | 42.0        | 4908653591          |
| 2014 | 2615.2                                  | 64.7        | 163.1       | 42.2        | 4979577288          |
